# Supplementary material for: IPA-3: An Inhibitor of Diadenylate Cyclase of Streptococcus suis with Potent Antimicrobial Activity
Source: MDPI journal article supplement (doi:10.3390/antibiotics11030418), 2022-03-21
Supplement: s1 [file s1]

**Supplementary Table S1. Bacterial strains and plasmids used in this study**

| Name                          | Description                                            | Reference or source |
|-------------------------------|--------------------------------------------------------|---------------------|
| <b>Strains</b>                |                                                        |                     |
| <i>S. suis</i> SC19           | <i>S. suis</i> serotype 2                              | [1]                 |
| <i>S. suis</i> SS2041         | Multiple-drug resistant strain                         | [2]                 |
| <i>E. coli</i> ATCC25922      | <i>E. coli</i> standard strain                         | Laboratory stock    |
| <i>S. aureus</i> ATCC29213    | <i>S. aureus</i> standard strain                       | Laboratory stock    |
| <i>S. aureus</i> 1213M4A      | Multiple-drug resistant strain                         | Laboratory stock    |
| <i>E. rhusiopathiae</i> 13013 | Multiple-drug resistant strain                         | [3]                 |
| <i>S. mutans</i> ATCC25175    | <i>S. mutans</i> standard strain                       | Laboratory stock    |
| <i>B. subtilis</i> WB800N     | Derivative of <i>B. subtilis</i> 168                   | [4]                 |
| <b>Plasmids</b>               |                                                        |                     |
| pET28a- <i>dacAcyto</i>       | Plasmid for the expression of ssDacA, Kan <sup>r</sup> | This study          |

**Supplementary Table S2. Primers used in this study**

| Strains                   | Sequence (5'-3')                         |
|---------------------------|------------------------------------------|
| ssDacA <sub>cyto</sub> -F | TAAGAAGGAGATATACCATGGGCGCTATGCTTGAAAACTC |
| ssDacA <sub>cyto</sub> -R | GTGGTGGTGGTGGTGTCTCGAGTTCATGTTTGCCACCTCC |

1. Li, W.; Liu, L.; Qiu, D.; Chen, H.; Zhou, R. Identification of *Streptococcus suis* serotype 2 genes preferentially expressed in the natural host. *Int J Med Microbiol* **2010**, *300*, 482-488, doi:10.1016/j.ijmm.2010.04.018.
2. Zou, G.; Zhou, J.; Xiao, R.; Zhang, L.; Cheng, Y.; Jin, H.; Li, L.; Zhang, L.; Wu, B.; Qian, P.; et al. Effects of Environmental and Management-Associated Factors on Prevalence and Diversity of *Streptococcus suis* in Clinically Healthy Pig Herds in China and the United Kingdom. *Appl Environ Microbiol* **2018**, *84*, doi:10.1128/aem.02590-17.
3. Ding, Y.; Zhu, D.; Zhang, J.; Yang, L.; Wang, X.; Chen, H.; Tan, C. Virulence determinants, antimicrobial susceptibility, and molecular profiles of *Erysipelothrix rhusiopathiae* strains isolated from China. *Emerg Microbes Infect* **2015**, *4*, e69, doi:10.1038/emi.2015.69.
4. Jeong, H.; Jeong, D.E.; Park, S.H.; Kim, S.J.; Choi, S.K. Complete Genome Sequence of *Bacillus subtilis* Strain WB800N, an Extracellular Protease-Deficient Derivative of Strain 168. *Microbiol Resour Announc* **2018**, *7*, doi:10.1128/mra.01380-18.
